# Supplementary material for: Biologic TNF-α Inhibitors for Stevens–Johnson Syndrome, Toxic Epidermal Necrolysis, and TEN-SJS Overlap: A Study-Level and Patient-Level Meta-Analysis
Source: Springer Nature journal article supplement (doi:10.1007/s13555-023-00928-w), 2023-05-13
Supplement: MOESM1 [file 25356570]

**Biologic TNF- $\alpha$  inhibitors for Steven-Johnsons syndrome, Toxic Epidermal Necrolysis, and TEN-SJS overlap: a study level and patient level meta-analysis**

**Running title: Biologic TNF- $\alpha$  inhibitors for SJS/TEN.**

**Jiali Cao<sup>1,\*</sup>, Xuan Zhang<sup>1</sup>, Xinzhu Xing<sup>1</sup>, Jie Fan<sup>2</sup>**

**Affiliations**

1. Department of Dermatology, Beijing Chaoyang Hospital, Capital Medical University, Beijing 100020, China
2. Medical Department, Shunyi Maternal and Children's Hospital of Beijing Children's Hospital, Beijing 101300, China.

**\*Corresponding Author**

**Jiali Cao**

Department of Dermatology, Beijing Chaoyang Hospital, Capital Medical University,  
No. 8 Gongti South Road, Chaoyang District, Beijing 100020, China

E-mail: [jialicao2302@163.com](mailto:jialicao2302@163.com)

Supplementary Table 1: Overview on the results of the quality assessment of the included studies (N = 55).

| Item                                                                                               | Answers and their frequencies/percentages |            |
|----------------------------------------------------------------------------------------------------|-------------------------------------------|------------|
|                                                                                                    | Yes                                       | No         |
| 1. Is the hypothesis/aim/objective of the study clearly described?                                 | 14 (25.5%)                                | 41 (74.5%) |
| 2. Are the main outcomes to be measured clearly described in the introduction or methods section?  | 48 (87.3%)                                | 7 (12.7%)  |
| 3. Are any outcome (relevant for the outcome of the present systematic review) described?          | 55 (100%)                                 | 0 (0%)     |
| 4. Was a main outcome identified?                                                                  | 14 (25.5%)                                | 41 (74.5%) |
| 5. Are the inclusion and exclusion criteria clearly stated in the introduction or methods section? | 7 (12.7%)                                 | 48 (87.3%) |
| 6. What proportion of subjects who were approached were ineligible to participate?                 | 4 (7.3%)                                  | 51 (92.7%) |
| 7. What proportion of subjects who were eligible refused to participate?                           | 0 (0%)                                    | 55 (100%)  |
| 8. Patients completed the allocated treatment regimen                                              | 2 (3.6%)                                  | 53 (96.4%) |
| Description of following confounding factor distribution for each group of patients                |                                           |            |
| 9. Age                                                                                             | 54 (98.2%)                                | 1 (1.8%)   |
| 10. Severity                                                                                       | 52 (84.5%)                                | 3 (5.5%)   |
| 11. BSA                                                                                            | 44 (80%)                                  | 11 (20%)   |
| 12. Years                                                                                          | 55 (100%)                                 | 0 (0%)     |
| 13. Reporting of 95% CI and/ or P value for mortality data*                                        | 4 (7.3%)                                  | 51 (92.7%) |

No description of item carries score 0, Description of each point score=1 except for reporting of mortality data where description of “95% CI and P value both” carries score - 0.67 and “only P value reporting” carries score - 0.33. BSA: Body surface area, CI: Confidence interval.

Supplementary Table 2: Detailed information on individual patient.

| Author     | Culprit drugs                           | Diagnosis       | Age | Sex | BSA (%) | SCORTE N | Intervention | Dose                      | Days after onset therapy given | Combined therapy                            | Timing with combined therapy | Time of re-epithelialization (days) | Hospitalization time (days) | Outcome                                        | Sequelae                                               |
|------------|-----------------------------------------|-----------------|-----|-----|---------|----------|--------------|---------------------------|--------------------------------|---------------------------------------------|------------------------------|-------------------------------------|-----------------------------|------------------------------------------------|--------------------------------------------------------|
| Infliximab |                                         |                 |     |     |         |          |              |                           |                                |                                             |                              |                                     |                             |                                                |                                                        |
| Gaitanis   | Sulfamethoxazole/trimethoprim           | SJS-TEN overlap | 72  | M   | 20      | 4        | Infliximab   | 5 mg/kg one-time infusion | 6                              | Corticosteroids + IVIG + Supportive therapy | Combined                     |                                     | 22                          | Survived                                       |                                                        |
| Paquet     | Ibuprofen                               | SJS-TEN overlap | 65  | M   | 15      |          | Infliximab   | 5 mg/kg one-time infusion | 4                              | NAC                                         | Combined                     | 2                                   |                             | Death (7 days after admission)                 |                                                        |
| Patmanidis | Trimethoprim-sulfamethoxazole           | SJS-TEN overlap | 74  | F   | 25      | 3        | Infliximab   | 5 mg/kg one-time infusion | 1                              | Corticosteroids + Supportive therapy        | Combined                     |                                     | 19                          | Survived                                       |                                                        |
| Al-Shouli  | Aphrodisiac herbal drugs and sildenafil | TEN             | 67  | M   | 40      |          | Infliximab   | 3 mg/kg one-time infusion | 12                             | Supportive therapy                          | Combined                     | 7                                   | 10                          | Survived                                       |                                                        |
| Burduk     | Trimetoprim plus sulphamethoxazole      | TEN             | 17  | F   | 80      |          | Infliximab   | 5 mg/kg one-time infusion |                                |                                             |                              |                                     |                             | Survived                                       | Nasolacrimal duct obstruction                          |
| Cardenas   | Ibuprofen and acetaminophen             | TEN             | 4   | F   | 90      |          | Infliximab   | 8 mg/kg one-time infusion | 14                             | Cyclosporine and IVIG                       | After                        | 60                                  | 60                          | Survived                                       |                                                        |
| Chafanska  | Mycoplasma pneumoniae                   | TEN             | 4   | M   | 30      |          | Infliximab   | 5 mg/kg one-time infusion | 5                              | Supportive therapy                          | Combined                     | 6                                   | 11                          | Survived                                       | Postinflammatory hyperpigmentation and dry eyes        |
| Fischer    | Co-trimoxazole                          | TEN             | 56  | F   | 35      |          | Infliximab   | 5 mg/kg one-time infusion | 4                              |                                             |                              |                                     |                             | Survived                                       |                                                        |
| Frederiks  | Pantoprazole                            | TEN             | 68  | M   | 40      | 4        | Infliximab   | 5 mg/kg one-time infusion | 1                              | Corticosteroids                             | Combined                     |                                     | 7                           | Death (7 days after admission)                 | Gastrointestinal bleeding, hypotension, hypoglycaemia. |
|            | Cefprozil                               | TEN             | 85  | M   | 40      | 3        | Infliximab   | 5 mg/kg one-time infusion | 6                              | Corticosteroids + IVIG + Supportive therapy | Combined                     |                                     |                             | Death with noticeably improved skin condition. |                                                        |
|            | Sulfamethoxazole/trimethoprim           | TEN             | 61  | M   | 30      | 4        | Infliximab   | 5 mg/kg one-time infusion | 6                              | Corticosteroids + IVIG + Supportive therapy | Combined                     |                                     | 21                          | Survived                                       | None                                                   |

|        |                                       |     |    |   |    |  |            |                                              |    |                                      |          |      |    |                                                 |                                                                                                                                                                                      |
|--------|---------------------------------------|-----|----|---|----|--|------------|----------------------------------------------|----|--------------------------------------|----------|------|----|-------------------------------------------------|--------------------------------------------------------------------------------------------------------------------------------------------------------------------------------------|
| Hunger | Diclofenac for headache               | TEN | 69 | F | 30 |  | Infliximab | 5 mg/kg one-time infusion                    | 4  |                                      |          | 5    |    | Survived                                        |                                                                                                                                                                                      |
| Jiang  | Methazolamide-induced                 | TEN | 36 | M | 35 |  | Infliximab | 4 mg/kg once and a second dose of at 5 mg/kg | 3  | Supportive therapy + Corticosteroids | After    | 7    | 21 | Survived                                        |                                                                                                                                                                                      |
| Kreft  | Etoricoxib for pain of herniated disk | TEN | 31 | M | 50 |  | Infliximab | 5 mg/kg one-time infusion                    |    | Corticosteroids                      | After    | 35   |    | Survived                                        | No lasting ophthalmological or urological sequels                                                                                                                                    |
| Kreft  |                                       | TEN | 11 | F |    |  | Infliximab | 250 mg one-time infusion                     | 3  | Corticosteroids + IVIG               | After    | 14   |    | Survived                                        | In addition to ophthalmic complications with entropion and increasing corneal neovascularization, hypertrophic, partially keloidal scarring on the skin was observed within 4 months |
| Kumar  | Pembrolizumab                         | TEN | 57 | F | 80 |  | Infliximab | 5 mg/kg one-time infusion                    |    | Corticosteroids                      | After    | None |    | Decision was made to focus care on comfort only |                                                                                                                                                                                      |
| Paquet | Nadroparine                           | TEN | 88 | F | 30 |  | Infliximab | 5 mg/kg one-time infusion                    | 2  | NAC                                  | Combined | 2    |    | A                                               |                                                                                                                                                                                      |
|        | Tramadol                              | TEN | 23 | F | 50 |  | Infliximab | 5 mg/kg one-time infusion                    | 13 | NAC                                  | Combined | 2    |    | A                                               |                                                                                                                                                                                      |
|        | Fluconazole                           | TEN | 50 | F | 60 |  | Infliximab | 5 mg/kg one-time infusion                    | 7  | NAC                                  | Combined | 2    |    | A                                               |                                                                                                                                                                                      |
|        | Amoxicilline                          | TEN | 60 | M | 50 |  | Infliximab | 5 mg/kg one-time infusion                    | 7  | NAC                                  | Combined | 2    |    | Death (9 days after admission)                  |                                                                                                                                                                                      |
| Plant  | Fluconazole or penicillin             | TEN | 32 | F |    |  | Infliximab | 5 mg/kg one-time infusion                    | 8  | IVIG + Supportive therapy            | After    |      |    | Survived despite poor prognostic indicators     | Pneumonia, septicaemia and hepatitis. Liver biopsy confirmed vanishing bile duct                                                                                                     |

|               |                                                                  |     |    |   |     |   |            |                                  |   |                                      |          |    |    |          |                                                                                                           |
|---------------|------------------------------------------------------------------|-----|----|---|-----|---|------------|----------------------------------|---|--------------------------------------|----------|----|----|----------|-----------------------------------------------------------------------------------------------------------|
|               |                                                                  |     |    |   |     |   |            |                                  |   |                                      |          |    |    |          | syndrome, thought to be either secondary to a drug-induced hepatitis or as a direct consequence of TEN.   |
| Scott-Lang    | Carbamazepine for epilepsy                                       | TEN | 7  | M |     |   | Infliximab | 5 mg/kg one-time infusion        | 4 | IVIG + Supportive therapy            | Combined | 10 | 15 | Survived | None                                                                                                      |
| Scott-Lang    | Carbamazepine                                                    | TEN | 7  | M |     |   | Infliximab | 5 mg/kg one-time infusion        | 4 | IVIG + Supportive therapy            | Combined | 10 | 30 | Survived | No long-term sequelae and, in particular, no scarring of skin or conjunctivae                             |
| Vivar         | Nivolumab for treatment of metastatic melanoma; anti-pd1 therapy | TEN | 50 | F | 90  | 5 | Infliximab | 5 mg/kg one-time infusion        |   | IVIG + corticosteroids               | Combined |    |    | Death    |                                                                                                           |
| Wallenborn    | Allopurinol, ibuprofen, and etoricoxib                           | TEN | 44 | M | 80  | 2 | Infliximab | 5 mg/kg one-time infusion        | 4 | Corticosteroids                      | After    | 28 | 28 | Survived |                                                                                                           |
| Wojtkiewicz   | Co-trimoxazole                                                   | TEN | 17 | F | 80  |   | Infliximab | 5 mg/kg one-time infusion        | 6 | Corticosteroids + Supportive therapy | Combined | 12 | 18 | Survived | Hyperpigmentation                                                                                         |
| Worsnop       | Sulfasalazine                                                    | TEN | 32 | F | 30  | 2 | Infliximab | 5 mg/kg one-time infusion        | 2 | IVIG                                 | After    | 9  | 26 | Survived | The infliximab treatment subsequently triggered erosive lichen planus (lp) involving the mouth and vulva. |
| Zárate-Correa | Furosemide                                                       | TEN | 76 | M | 100 | 2 | Infliximab | 3 mg/kg one-time infusion        | 4 | Supportive therapy                   |          | 9  |    | Survived | Infections                                                                                                |
|               |                                                                  |     |    |   |     |   |            |                                  |   |                                      |          |    |    |          |                                                                                                           |
| Adalimumab    |                                                                  |     |    |   |     |   |            |                                  |   |                                      |          |    |    |          |                                                                                                           |
| Kherlopian    | Chadox1 ncov-19 (AZD1222) vaccine                                | TEN | 48 |   | 90  | 3 | Adalimumab | 80 mg day 0, 40 mg day 3 & day 7 | 0 |                                      |          | 34 | 35 | Survived |                                                                                                           |
|               | Febuxostat, lornoxicam,                                          | TEN | 30 |   | 80  | 2 | Adalimumab | 80 mg day 0                      | 0 | Corticosteroids + IVIG               | Combined | 20 | 23 | Survived |                                                                                                           |

|            |                                                |     |    |   |                  |   |            |                               |   |                 |          |   |    |                                                                                       |      |
|------------|------------------------------------------------|-----|----|---|------------------|---|------------|-------------------------------|---|-----------------|----------|---|----|---------------------------------------------------------------------------------------|------|
|            | pregabalin,<br>naproxen                        |     |    |   |                  |   |            |                               |   |                 |          |   |    |                                                                                       |      |
|            | Lamotrigine                                    | TEN | 16 |   | 35               | 1 | Adalimumab | 40 mg day 0                   | 0 |                 |          | 9 | 15 | Survived                                                                              |      |
|            | Cefazolin,<br>flucloxacillin,<br>pembrolizumab | TEN | 61 |   | 60               | 4 | Adalimumab | 80 mg                         | 6 | Corticosteroids | Combined | 6 | 18 | Resolution<br>of TEN,<br>Deceased<br>due to<br>progression<br>of<br>Stage IV<br>NSCLC |      |
|            |                                                |     |    |   |                  |   |            |                               |   |                 |          |   |    |                                                                                       |      |
| Etanercept |                                                |     |    |   |                  |   |            |                               |   |                 |          |   |    |                                                                                       |      |
| Ao         | Carbamazepine                                  | SJS | 24 | M |                  | 1 | Etanercept | 25 mg twice a<br>week         |   | Corticosteroids | Combined |   | 6  | Survived                                                                              | None |
|            | Carbamazepine                                  | SJS | 44 | M |                  | 3 | Etanercept | 25 mg twice a<br>week         |   | Corticosteroids | Combined |   | 10 | Survived                                                                              | None |
|            | Allopurinol                                    | SJS | 24 | M |                  | 5 | Etanercept | 25 mg twice a<br>week         |   | Corticosteroids | Combined |   | 12 | Survived                                                                              | None |
|            | Lamotrigine                                    | SJS | 67 | M |                  | 2 | Etanercept | 25 mg twice a<br>week         |   | Corticosteroids | Combined |   | 12 | Survived                                                                              | None |
|            | Carbamazepine                                  | SJS | 53 | F |                  | 5 | Etanercept | 25 mg twice a<br>week         |   | Corticosteroids | Combined |   | 8  | Survived                                                                              | None |
|            | Nsaids                                         | SJS | 72 | M |                  | 4 | Etanercept | 25 mg twice a<br>week         |   | Corticosteroids | Combined |   | 14 | Survived                                                                              | None |
|            | Carbamazepine                                  | SJS | 37 | M |                  | 2 | Etanercept | 25 mg twice a<br>week         |   | Corticosteroids | Combined |   | 13 | Survived                                                                              | None |
|            | Carbamazepine                                  | SJS | 57 | F |                  | 4 | Etanercept | 25 mg twice a<br>week         |   | Corticosteroids | Combined |   | 10 | Survived                                                                              | None |
|            | Lamotrigine                                    | SJS | 19 | F |                  | 0 | Etanercept | 25 mg twice a<br>week         |   | Corticosteroids | Combined |   | 15 | Survived                                                                              | None |
|            | Tcm                                            | SJS | 28 | F |                  | 0 | Etanercept | 25 mg twice a<br>week         |   | Corticosteroids | Combined |   | 10 | Survived                                                                              | None |
| Dreyer     | Mycoplasma                                     |     |    |   | Mucosa<br>1 only | 0 | Etanercept | 50 mg/ml<br>one-time infusion |   |                 |          | 7 |    | Survived                                                                              |      |
|            | Trimethoprim-sulfa<br>methoxazole              |     |    |   | 8                | 2 | Etanercept | 50 mg/ml<br>one-time infusion |   | IVIG            | Combined |   |    | Survived                                                                              |      |
|            | Vancomycin vs                                  |     |    |   | 5                | 1 | Etanercept | 50 mg/ml                      |   |                 |          | 3 |    | Survived                                                                              |      |

|                  |                                  |                 |    |   |               |     |            |                                 |    |                    |          |    |    |          |      |
|------------------|----------------------------------|-----------------|----|---|---------------|-----|------------|---------------------------------|----|--------------------|----------|----|----|----------|------|
|                  | cefepime                         |                 |    |   |               |     |            | one-time infusion               |    |                    |          |    |    |          |      |
|                  | Piperacillin-tazobactam          |                 |    |   | 9             | 0   | Etanercept | 50 mg/ml one-time infusion      |    | IVIG               | Combined |    |    | Survived |      |
|                  | Trimethoprim-sulfamethoxazole    |                 |    |   | Mucosa l only | 1   | Etanercept | 50 mg/ml one-time infusion      |    |                    |          |    |    | Survived |      |
| Torres - Navarro | Allopurinol                      | SJS             | 20 | F | 10            | 4   | Etanercept | 50 mg/ml one-time infusion      | 9  |                    |          |    | 15 | Survived |      |
| Wang             | Lamotrigine and sodium valproate | SJS             | 28 | F | 10            | 0   | Etanercept | 50 mg/ml one-time infusion      | 14 | IVIG               | Combined | 7  |    | Survived | None |
|                  |                                  |                 |    |   |               |     |            |                                 |    |                    |          |    |    |          |      |
| Ao               | Nsaids                           | SJS/TEN overlap | 33 | F |               | 3   | Etanercept | 25 mg twice a week              |    | Corticosteroids    | Combined |    | 17 | Survived | None |
| Chong            | Nsaids                           | SJS/TEN overlap | 77 | M | 15            | 2   | Etanercept | 50 mg/ml one-time infusion      | 7  | Antibiotic         |          | 2  | 5  | Survived | None |
| Dreyer           | Trimethoprim-sulfamethoxazole    | SJS/TEN overlap |    |   | 20            | 2   | Etanercept | 50 mg/ml one-time infusion      |    |                    |          | 7  |    | Survived |      |
|                  | Trimethoprim-sulfamethoxazole    | SJS/TEN overlap |    |   | 18            | 4   | Etanercept | 50 mg/ml one-time infusion      |    | IVIG               | Combined | 29 |    | Survived |      |
| Gavigan          | Sulfamethoxazole-trimethoprim    | SJS/TEN overlap | 11 | F | 25            |     | Etanercept | 25 mg, 2 doses, every other day | 2  | Corticosteroids    | Combined | 12 |    | Survived | None |
| López-Gómez      | Ribociclib-related               | SJS/TEN overlap | 77 | F | 20            |     | Etanercept | 40 mg one-time infusion         |    | Corticosteroids    | Combined | 6  |    | Survived |      |
| Torres - Navarro | Lamotrigine                      | SJS/TEN overlap | 16 | F | 20            | 1   | Etanercept | 50 mg/ml one-time infusion      | 1  |                    |          |    | 11 | Survived |      |
|                  |                                  |                 |    |   |               |     |            |                                 |    |                    |          |    |    |          |      |
| Ao               | Carbamazepine                    | TEN             | 71 | F |               | 3   | Etanercept | 25 mg twice a week              |    | Corticosteroids    | Combined |    | 10 | Survived | None |
|                  | Allopurinol                      | TEN             | 20 | M |               | 1   | Etanercept | 25 mg twice a week              |    | Corticosteroids    | Combined |    | 12 | Survived | None |
|                  | Lamotrigine                      | TEN             | 19 | F |               | 4   | Etanercept | 25 mg twice a week              |    | Corticosteroids    | Combined |    | 13 | Survived | None |
|                  | Nsaids                           | TEN             | 29 | F |               | 3   | Etanercept | 25 mg twice a week              |    | Corticosteroids    | Combined |    | 27 | Survived | None |
| Bakir            | Pfizer COVID-19 vaccine          | TEN             | 49 | F | 30            | 2   | Etanercept | Two doses of 50 mg/ml           | 1  |                    |          | 22 |    | Survived | None |
| Chahal           | Meningococcal B vaccine          | TEN             | 19 | F | 80            | 3.2 | Etanercept | 50 mg/ml one-time infusion      | 3  | Supportive therapy | Combined | 3  | 7  | Survived |      |
| Choi             | Trimethoprim-sulfamethoxazole    | TEN             | 46 | M | 90            | 3   | Etanercept | Two doses of 50 mg/ml           | 5  | Corticosteroids    | Combined | 15 | 23 | Survived |      |

|           |                                                                    |     |    |   |    |   |            |                                                                                          |   |                           |          |    |    |               |                                              |
|-----------|--------------------------------------------------------------------|-----|----|---|----|---|------------|------------------------------------------------------------------------------------------|---|---------------------------|----------|----|----|---------------|----------------------------------------------|
|           | methoxazole                                                        |     |    |   |    |   |            | mg/ml                                                                                    |   |                           |          |    |    |               |                                              |
| Coulombe  | Carbamazepine                                                      | TEN | 17 | M | 45 | 1 | Etanercept | 50 mg/ml<br>one-time infusion                                                            | 1 | Corticosteroids           | Combined | 12 | 14 | Survived      | None                                         |
| Didona    | Rituximab                                                          | TEN | 60 | M | 30 | 3 | Etanercept | 50 mg/ml<br>one-time infusion                                                            |   | Corticosteroids           | Combined |    |    | Survived      |                                              |
| Dreyer    | Levofloxacin                                                       | TEN |    |   | 50 | 3 | Etanercept | 50 mg/ml<br>one-time infusion                                                            |   | IVIG                      | Combined | 7  |    | Survived      |                                              |
|           | Trimethoprim/sulfa<br>methoxazole                                  | TEN |    |   | 80 | 2 | Etanercept | 50 mg/ml<br>one-time infusion                                                            |   |                           |          | 6  |    | Survived      |                                              |
|           | Unknown                                                            | TEN |    |   | 70 | 2 | Etanercept | 50 mg/ml<br>one-time infusion                                                            |   |                           |          | 3  |    | Survived      |                                              |
|           | Trimethoprim/sulfa<br>methoxazole                                  | TEN |    |   | 35 | 3 | Etanercept | 50 mg/ml<br>one-time infusion                                                            |   |                           |          | NK |    | Survived      |                                              |
|           | Trimethoprim/sulfa<br>methoxazole or<br>NSAID                      | TEN |    |   | 50 | 5 | Etanercept | 50 mg/ml<br>one-time infusion                                                            |   |                           |          | NK |    | Survived      |                                              |
|           | Trimethoprim/sulfa<br>methoxazole or<br>temozolomide or<br>aspirin | TEN |    |   | 40 | 3 | Etanercept | 50 mg/ml<br>one-time infusion                                                            |   |                           |          | 19 |    | Survived      |                                              |
| Eliades   | Trimethoprim/sulfa<br>methoxazole                                  | TEN | 4  | M | 80 |   | Etanercept | 50 mg/ml<br>one-time infusion                                                            | 4 | Supportive therapy        | Combined | 18 | 18 | Survived      | Persistent dry eye<br>disease                |
|           | Acetaminophen or<br>influenza vaccine                              | TEN | 7  | F | 80 |   | Etanercept | 50 mg/ml two<br>dose                                                                     | 4 | Supportive therapy        | Combined | 13 | 20 | Survived      | Persistent dry eye<br>disease, trichiasis    |
|           | Trimethoprim/sulfa<br>methoxazole                                  | TEN | 18 | F | 30 |   | Etanercept | 50 mg/ml<br>one-time infusion                                                            | 1 | Supportive therapy        | Combined |    | 4  | Survived      |                                              |
|           | Amoxicillin-clavul<br>anate or mefenamic<br>acid                   | TEN | 7  | F | 50 |   | Etanercept | 50 mg/ml two<br>dose                                                                     | 1 | Supportive therapy        | Combined | 10 | 23 | Survived      | Trichiasis, excessive<br>tearing             |
| Estébanez | Levetiracetam                                                      | TEN | 8  | M | 30 |   | Etanercept | 0.8 mg/kg<br>one-time infusion.<br>A second dose of<br>25 mg was given<br>one week later | 3 | Corticosteroids +<br>IVIG | After    | 16 |    | Survived      | Bilateral ulcerative<br>keratoconjunctivitis |
| Famularo  | Ciprofloxacin                                                      | TEN | 59 | M | 60 |   | Etanercept | 25 mg two dose,<br>every<br>other day                                                    | 4 | Corticosteroids           | After    | 6  |    | Death         |                                              |
| Faris     | Sulfamethoxazole/t                                                 | TEN | 71 | F | 90 |   | Etanercept | 50 mg/ml                                                                                 | 8 | Corticosteroids           |          |    |    | Death (day 2) |                                              |



|           |                                                       |     |    |   |    |   |            |                                                           |    |                                                              |          |    |    |                                |                                                             |
|-----------|-------------------------------------------------------|-----|----|---|----|---|------------|-----------------------------------------------------------|----|--------------------------------------------------------------|----------|----|----|--------------------------------|-------------------------------------------------------------|
|           | rimethoprim                                           |     |    |   |    |   |            | one-time infusion                                         |    |                                                              |          |    |    | after etanercept)              |                                                             |
|           |                                                       | TEN | 74 | F | 90 |   | Etanercept | 50 mg/ml one-time infusion                                | 8  | Antibiotic                                                   | After    |    |    | Death (day 16 after admission) |                                                             |
|           | Sulfamethoxazole/t rimethoprim                        | TEN | 40 | F | 40 |   | Etanercept | 50 mg/ml one-time infusion                                | 3  | Corticosteroids                                              |          |    |    | Death (day 11 after admission) |                                                             |
| Frederiks | Lamotrigine                                           | TEN | 24 | F | 40 | 1 | Etanercept | 50 mg/ml one-time infusion                                | 4  | Corticosteroids + ivig + antibiotic                          | Combined |    | 42 | Survived                       | Aspiration pneumonia, bacteraemia, symblepharon             |
|           | Amoxicillin                                           | TEN | 46 | F | 50 | 1 | Etanercept | 50 mg/ml one-time infusion                                | 1  | Corticosteroids + ivig + antibiotic                          | Combined |    | 31 | Survived                       | Symblepharon, ocular vzv, deranged liver function tests     |
|           | Ibuprofen                                             | TEN | 51 | M | 50 | 3 | Etanercept | 50 mg/ml one-time infusion                                | 1  | Corticosteroids                                              | Combined |    | 37 | Survived                       | AMT failure requiring further surgery, UTI, hypomagnesaemia |
|           | Acetazolamide                                         | TEN | 68 | M | 90 | 4 | Etanercept | 50 mg/ml one-time infusion                                | 1  | Corticosteroids + ivig + antibiotic                          | Combined |    | 14 | Death (day 14 after admission) | Secondary hlh; multi-organ failure; gastrointestinal bleed  |
| Gubinelli | Phenobarbital-induced                                 | TEN | 59 | F |    |   | Etanercept | 25 mg/day twice (once every other day)                    | 3  | Supportive therapy + Corticosteroids                         | Combined | 20 |    | Survived                       |                                                             |
| Lee       | Mefenamic acid and amoxicillin for a dental procedure | TEN | 32 | M | 40 | 1 | Etanercept | 50 mg and 25 mg on the 3rd and 5th day of hospitalization | 3  | Corticosteroids                                              | After    | 14 | 14 | Survived                       | None                                                        |
| Maximova  |                                                       | TEN | 21 | F | 50 |   | Etanercept | 25 mg one-time infusion                                   | 34 | Corticosteroids + IVIG                                       | Combined | 11 |    | Survived                       |                                                             |
| Natsis    |                                                       | TEN | 20 | F | 60 |   | Etanercept | 50 mg one-time infusion                                   |    |                                                              |          |    | 30 | Survived                       |                                                             |
| Osawa     | Apalutamide for metastatic prostate cancer            | TEN | 77 | M |    | 4 | Etanercept | 50 mg once a week for 6 dose                              | 43 | Corticosteroids + IVIG + mpsl pulse therapy + Plasmapheresis | Combined |    |    | Survived                       |                                                             |
| Paradisi  | Carbamazepine                                         | TEN | 57 | F |    | 6 | Etanercept | 50 mg one-time                                            | 3  | Supportive therapy                                           |          | 12 |    | Survived                       | None                                                        |

|          |                            |     |    |   |  |   |            |                         |   |                    |  |    |  |          |      |
|----------|----------------------------|-----|----|---|--|---|------------|-------------------------|---|--------------------|--|----|--|----------|------|
|          |                            |     |    |   |  |   |            | infusion                |   |                    |  |    |  |          |      |
|          | Ofloxacin                  | TEN | 70 | M |  | 3 | Etanercept | 50 mg one-time infusion | 3 | Supportive therapy |  | 8  |  | Survived | None |
|          | Lansoprazole, azathioprine | TEN | 28 | F |  | 2 | Etanercept | 50 mg one-time infusion | 3 | Supportive therapy |  | 8  |  | Survived | None |
|          | Methylprednisolone         | TEN | 62 | F |  | 3 | Etanercept | 50 mg one-time infusion | 3 | Supportive therapy |  | 12 |  | Survived | None |
|          | Carbamazepine              | TEN | 73 | M |  | 4 | Etanercept | 50 mg one-time infusion | 3 | Supportive therapy |  | 8  |  | Survived | None |
|          | Carbamazepine              | TEN | 78 | M |  | 5 | Etanercept | 50 mg one-time infusion | 3 | Supportive therapy |  | 7  |  | Survived | None |
|          | Phytotherapy product       | TEN | 72 | F |  | 2 | Etanercept | 50 mg one-time infusion | 3 | Supportive therapy |  | 8  |  | Survived | None |
|          | Carbamazepine              | TEN | 50 | F |  | 6 | Etanercept | 50 mg one-time infusion | 3 | Supportive therapy |  | 20 |  | Survived | None |
|          | Carbamazepine              | TEN | 71 | M |  | 2 | Etanercept | 50 mg one-time infusion | 3 | Supportive therapy |  | 9  |  | Survived | None |
|          | Diclofenac                 | TEN | 55 | F |  | 3 | Etanercept | 50 mg one-time infusion | 3 | Supportive therapy |  | 9  |  | Survived | None |
| Paradisi | Mirtazapine                | TEN | 68 | F |  | 5 | Etanercept | 50 mg one-time infusion | 3 | Supportive therapy |  | 8  |  | Survived | None |
|          | Carbamazepine              | TEN | 71 | F |  | 4 | Etanercept | 50 mg one-time infusion | 3 | Supportive therapy |  | 21 |  | Survived | None |
|          | Naproxen                   | TEN | 67 | M |  | 6 | Etanercept | 50 mg one-time infusion | 3 | Supportive therapy |  | 9  |  | Survived | None |
|          | Ciprofloxacin              | TEN | 74 | M |  | 5 | Etanercept | 50 mg one-time infusion | 3 | Supportive therapy |  | 8  |  | Survived | None |
|          | Allopurinol                | TEN | 55 | F |  | 3 | Etanercept | 50 mg one-time infusion | 3 | Supportive therapy |  | 7  |  | Survived | None |
|          | Diclofenac                 | TEN | 57 | F |  | 3 | Etanercept | 50 mg one-time infusion | 3 | Supportive therapy |  | 7  |  | Survived | None |
|          | Ciprofloxacin              | TEN | 79 | F |  | 4 | Etanercept | 50 mg one-time infusion | 3 | Supportive therapy |  | 8  |  | Survived | None |
|          | Diclofenac                 | TEN | 90 | M |  | 6 | Etanercept | 50 mg one-time infusion | 3 | Supportive therapy |  | 6  |  | Death    |      |
|          | Cephalosporin              | TEN | 81 | M |  | 4 | Etanercept | 50 mg one-time infusion | 3 | Supportive therapy |  | 8  |  | Survived | None |
|          | Cephalosporin              | TEN | 81 | M |  | 5 | Etanercept | 50 mg one-time          | 3 | Supportive therapy |  | 8  |  | Survived | None |

|                  |                                                |     |    |   |    |   |            |                                 |   |                                      |          |    |    |          |                                                                                                                             |
|------------------|------------------------------------------------|-----|----|---|----|---|------------|---------------------------------|---|--------------------------------------|----------|----|----|----------|-----------------------------------------------------------------------------------------------------------------------------|
|                  |                                                |     |    |   |    |   |            | infusion                        |   |                                      |          |    |    |          |                                                                                                                             |
|                  | Rituximab                                      | TEN | 51 | M |    | 4 | Etanercept | 50 mg one-time infusion         | 3 | Supportive therapy                   |          | 8  |    | Survived | None                                                                                                                        |
|                  | Rituximab                                      | TEN | 61 | F |    | 5 | Etanercept | 50 mg one-time infusion         | 3 | Supportive therapy                   |          | 10 |    | Survived | None                                                                                                                        |
|                  | Ibuprofen                                      | TEN | 77 | F |    | 4 | Etanercept | 50 mg one-time infusion         | 3 | Supportive therapy                   |          | 8  |    | Survived | None                                                                                                                        |
|                  | Paracetamol                                    | TEN | 19 | M |    | 2 | Etanercept | 50 mg one-time infusion         | 3 | Supportive therapy                   |          | 9  |    | Survived | None                                                                                                                        |
|                  | Cephalosporin                                  | TEN | 27 | M |    | 3 | Etanercept | 50 mg one-time infusion         | 3 | Supportive therapy                   |          | 9  |    | Survived | None                                                                                                                        |
|                  | Allopurinol                                    | TEN | 90 | M |    | 6 | Etanercept | 50 mg one-time infusion         | 3 | Supportive therapy                   |          | 7  |    | Death    |                                                                                                                             |
|                  | Azathioprine                                   | TEN | 81 | F |    | 4 | Etanercept | 50 mg one-time infusion         | 3 | Supportive therapy                   |          | 8  |    | Survived | None                                                                                                                        |
| Shen             | Human herpesvirus 7                            | TEN | 12 | F | 60 |   | Etanercept | Two dose 25 mg                  | 6 | Corticosteroids                      | After    | 21 | 23 | Survived | Pterygium and postinflammatory hyperpigmentation.                                                                           |
| Sibbald          | Ibuprofen/acetaminophen                        | TEN | 2  | M |    | 4 | Etanercept | 0.4 mg/kg on days 6 + 8         | 6 | IVIG + corticosteroids               | Combined |    | 52 | Survived | In hospital complications: infections (cutaneous, urinary tract); sequelae after discharge: persistent skin dyspigmentation |
| Torres - Navarro | Ibuprofen                                      | TEN | 30 | F | 95 | 2 | Etanercept | 50 mg in a single dose          | 5 |                                      |          |    | 19 | Survived |                                                                                                                             |
| Zander           | Sulfamethoxazole-trimethoprim for epididymitis | TEN | 13 | M | 50 |   | Etanercept | Two 50 mg doses four days apart | 2 | Corticosteroids + Supportive therapy | Combined | 5  | 13 | Survived | None                                                                                                                        |
| Zhang            | Alamotrigine                                   | TEN | 50 | F | 70 | 3 | Etanercept | 50 mg/ml one-time infusion      | 8 | Corticosteroids + IVIG               |          |    |    | Death    |                                                                                                                             |
